# Supplementary material
Source: ML conference proceedings conference paper supplement (https://proceedings.mlr.press/v119/finlay20a.html)
Supplement: Supplementary file 1 [file finlay20a-supp.pdf]

## A. Details of Section 3.1: Benamou-Brenier formulation in Lagrangian coordinates

The Benamou-Brenier formulation of the optimal transportation (OT) problem in Eulerian coordinates is

$$\min_{\mathbf{f}, \rho} \int_0^T \int \|\mathbf{f}(\mathbf{x}, t)\|^2 \rho_t(\mathbf{x}) \, d\mathbf{x} dt \quad (18a)$$

$$\text{subject to} \quad \frac{\partial \rho_t}{\partial t} = -\operatorname{div}(\rho_t \mathbf{f}), \quad (18b)$$

$$\rho_0(\mathbf{x}) = p, \quad (18c)$$

$$\rho_T(\mathbf{z}) = q. \quad (18d)$$

The connection between continuous normalizing flows (CNF) and OT becomes transparent once we rewrite (18) in Lagrangian coordinates. Indeed, for regular enough velocity fields  $\mathbf{f}$  one has that the solution of the continuity equation (18b), (18c) is given by  $\rho_t = \mathbf{z}(\cdot, t)\#p$  where  $\mathbf{z}$  is the flow

$$\dot{\mathbf{z}}(\mathbf{x}, t) = \mathbf{f}(\mathbf{z}(\mathbf{x}, t), t), \quad \mathbf{z}(\mathbf{x}, 0) = \mathbf{x}.$$

The relation  $\rho_t = \mathbf{z}(\cdot, t)\#p$  means that for arbitrary test function  $\phi$  we have that

$$\int \phi(\mathbf{x}) \rho_t(\mathbf{x}, t) \, d\mathbf{x} = \int \phi(\mathbf{z}(\mathbf{x}, t)) p(\mathbf{x}) \, d\mathbf{x}$$

Therefore (18) can be rewritten as

$$\min_{\mathbf{f}} \int_0^T \int \|\mathbf{f}(\mathbf{z}(\mathbf{x}, t), t)\|^2 p(\mathbf{x}) \, d\mathbf{x} dt \quad (19a)$$

$$\text{subject to} \quad \dot{\mathbf{z}}(\mathbf{x}, t) = \mathbf{f}(\mathbf{z}(\mathbf{x}, t), t), \quad (19b)$$

$$\mathbf{z}(\mathbf{x}, 0) = \mathbf{x}, \quad (19c)$$

$$\mathbf{z}(\cdot, T)\#p = q. \quad (19d)$$

Note that  $\rho_t$  is eliminated in this formulation. The terminal condition (18d) is trivial to implement in Eulerian coordinates (grid-based methods) but not so simple in Lagrangian ones (19d) (grid-free methods). To enforce (19d) we introduce a penalty term in the objective function that measures the deviation of  $\mathbf{z}(\cdot, T)\#p$  from  $q$ . Thus, the penalized objective function is

$$\int_0^T \int \|\mathbf{f}(\mathbf{z}(\mathbf{x}, t), t)\|^2 p(\mathbf{x}) \, d\mathbf{x} dt + \frac{1}{\lambda} \operatorname{KL}(\mathbf{z}(\cdot, T)\#p \parallel q), \quad (20)$$

where  $\lambda > 0$  is the penalization strength. Next, we observe that this objective function can be written as an expectation with respect to  $\mathbf{x} \sim p$ . Indeed, the Kullback-Leibler divergence is invariant under coordinate transformations, and therefore

$$\begin{aligned} \operatorname{KL}(\mathbf{z}(\cdot, T)\#p \parallel q) &= \operatorname{KL}(p \parallel \mathbf{z}^{-1}(\cdot, T)\#q) = \operatorname{KL}(p \parallel p_\theta) \\ &= \mathbb{E}_{\mathbf{x} \sim p} \log \frac{p(\mathbf{x})}{p_\theta(\mathbf{x})} \\ &= \mathbb{E}_{\mathbf{x} \sim p} \log p(\mathbf{x}) - \mathbb{E}_{\mathbf{x} \sim p} \log p_\theta(\mathbf{x}) \end{aligned}$$

Hence, multiplying the objective function in (20) by  $\lambda$  and ignoring the  $\mathbf{f}$ -independent term  $\mathbb{E}_{\mathbf{x} \sim p} \log p(\mathbf{x})$  we obtain an equivalent objective function

$$\mathbb{E}_{\mathbf{x} \sim p} \left\{ \lambda \int_0^T \|\mathbf{f}(\mathbf{z}(\mathbf{x}, t), t)\|^2 \, dt - \log p_\theta(\mathbf{x}) \right\} \quad (21)$$

Finally, if we assume that  $\{\mathbf{x}_i\}_{i=1}^N$  are iid sampled from  $p$ , we obtain the empirical objective function

$$\frac{\lambda}{N} \sum_{i=1}^N \int_0^T \|\mathbf{f}(\mathbf{z}(\mathbf{x}_i, t), t)\|^2 \, dt - \frac{1}{N} \sum_{i=1}^N \log p_\theta(\mathbf{x}_i) \quad (22)$$

## B. Additional results

Here we present additional generated samples on the two larger datasets considered, CelebA-HQ and ImageNet64. In addition bits/dim on clean images are reported in Table 2.

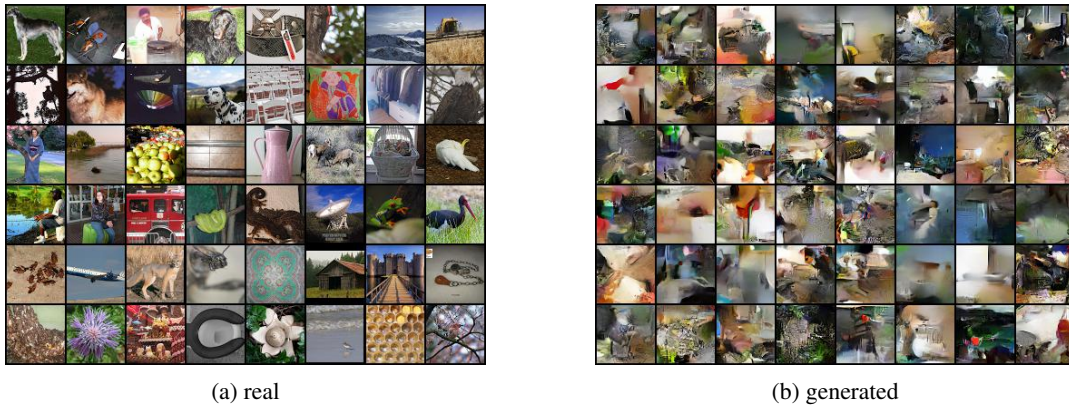

Figure 7. Quality of FFIJORD RNODE generated images on ImageNet-64.

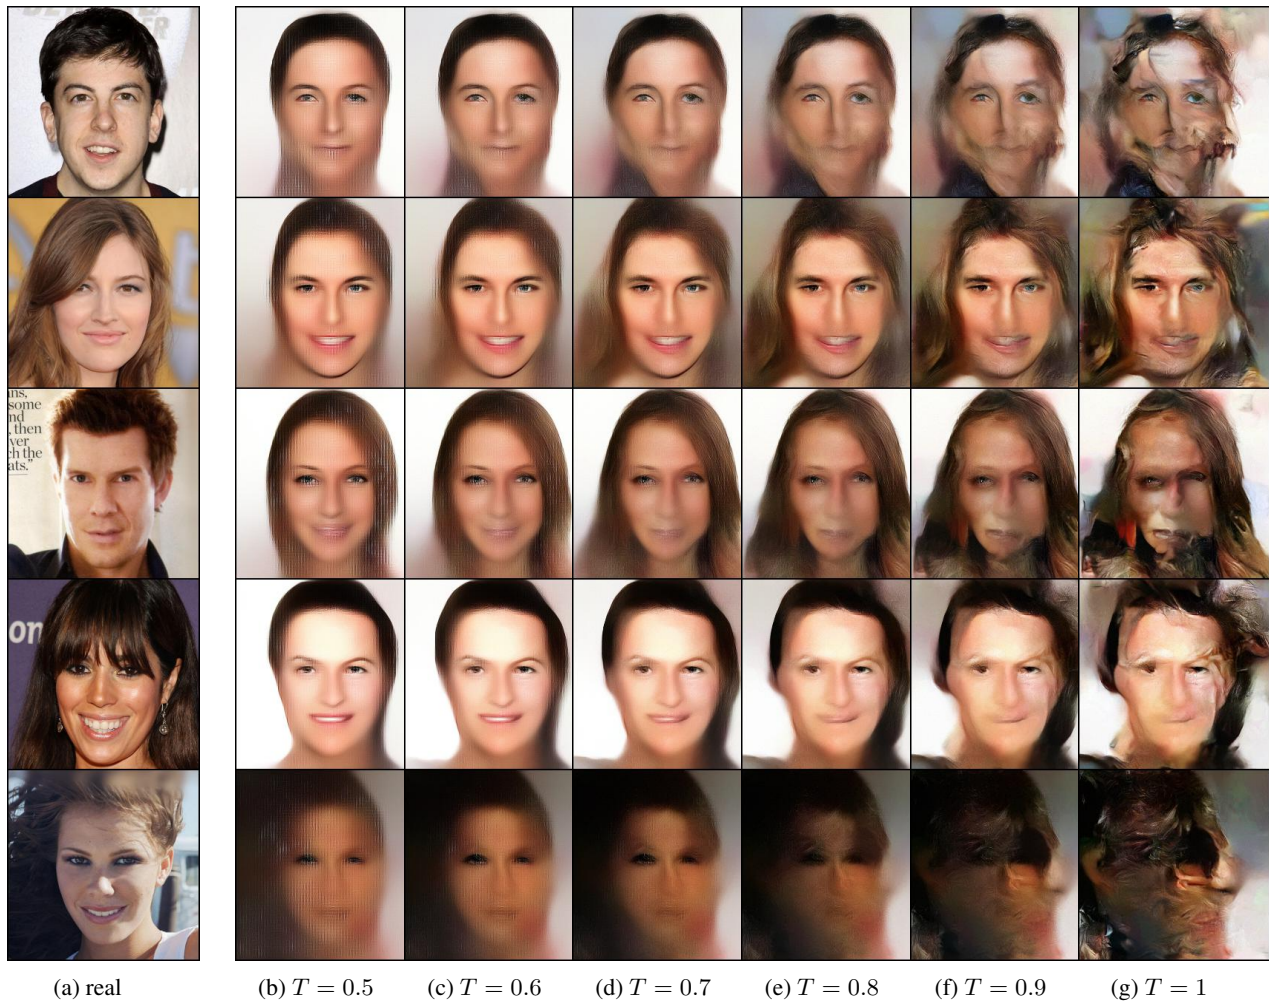

Figure 8. Quality of FFIJORD RNODE generated images on CelebA-HQ. We use temperature annealing, as described in (Kingma & Dhariwal, 2018), to generate visually appealing images, with  $T = 0.5, \dots, 1$ .

Table 2. Additional results and model statistics of FFJORD RNODE. Here we report validation bits/dim on both validation images, and on validation images with uniform variational dequantization (ie perturbed by uniform noise). We also report number of trainable model parameters.

| DATASET      | BITS/DIM (CLEAN) | BITS/DIM (DIRTY) | # PARAMETERS |
|--------------|------------------|------------------|--------------|
| MNIST        | 0.92             | 0.97             | 8.00e5       |
| CIFAR10      | 3.25             | 3.38             | 1.36e6       |
| IMAGENET64   | 3.72             | 3.83             | 2.00e6       |
| CELEBA-HQ256 | 0.72             | 1.04             | 4.61e6       |
